# Supplementary material for: Influence of surface tension-driven network parameters on backflow strength
Source: Royal Society of Chemistry journal article supplement (doi:10.1039/c8ra09756a), 2019-01-01
Supplement: c8ra09756a1.pdf [file c8ra09756a1.pdf]

## Electronic Supplementary Information

### 1. Modeling pressures of inlet meniscus and channel junction.

By Young–Laplace equation, the meniscus pressure ( $P_i$ ) of inlet  $i$  is given as a function of the radius of curvature ( $R_i$ ) and the surface tension ( $\sigma$ ); see Figure S1a:

$$P_i = \frac{2\sigma}{R_i(t)} \quad (\text{S1})$$

If the meniscus at inlet  $i$  does not exceed the edge of inlet  $i$ , by the Pythagorean theorem,  $R_i$  is a function of the height ( $h_i$ ) of the meniscus and the radius ( $r_i$ ) of inlet  $i$ :

$$R_i(t) = \frac{h_i(t)^2 + r_i^2}{2h_i(t)} \quad (\text{S2})$$

Equation (S2) is obtained by the condition where inlet meniscus is pinned at the inlet rim. By inserting eq S2 into eq S1, we can rewrite  $P_i$  as

$$P_i = \frac{4\sigma h_i(t)}{(h_i(t))^2 + r_i^2} \quad (\text{S3})$$

Then, the sum of flow rates passing through the channel junction is obtained by the analogy of Kirchhoff's current law (see Figure S1b):

$$\sum_{i=1}^k C_i (P_{\text{JCT}} - P_i) = 0 \quad (\text{S4})$$

where  $C_i$  is the fluidic conductance of channel  $i$ , which is the inverse of fluidic resistance; and  $P_{\text{JCT}}$  is the channel junction pressure. Herein, channel fluidic resistance,  $R_i = a_i L_i$

$$a_i = \frac{3\mu_j}{64w_i h^3} \left[ 1 - \frac{192h}{\pi^5 w_i} \sum_{n=1,2,3,\dots}^{\infty} \frac{\tanh\left(\frac{(2n-1)\pi w_i}{2h}\right)}{(2n-1)^5} \right]^{-1} \quad (\text{S5})$$

where  $\mu_j$  is dynamic viscosity of each solution that passes the microchannel, and  $w_i$ ,  $L_i$ , and  $h$  are the width, length, and height of the microchannels, respectively.

Then, the junction pressure  $P_{\text{JCT}}$  is

$$P_{\text{JCT}} = \frac{\sum_{i=1}^k P_i C_i}{\sum_{i=1}^k C_i} \quad (\text{S6})$$

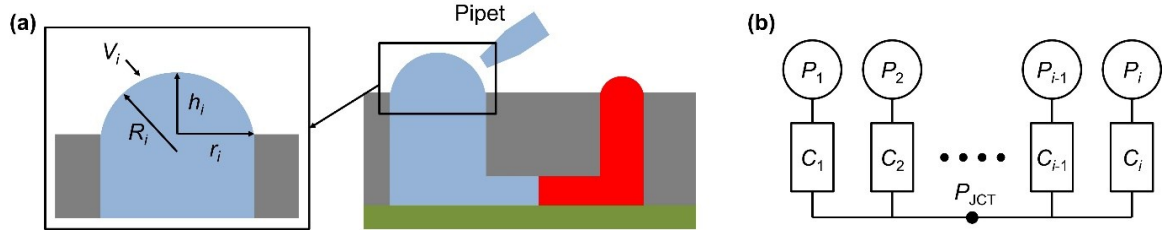

**Figure S1.** (a) Meniscus of inlet and generation of Laplace pressure. (b) Diagram showing fluidic circuit.

## 2. Modeling the relation between meniscus height and inlet pressure.

Owing to the similarity between fluidic resistance and electrical resistance, the flow rate ( $Q_i$ ) from the channel junction to inlet  $i$  via channel  $i$  can be expressed as (see Figure S1b)

$$Q_i = C_i(P_{\text{JCT}} - P_i) \quad (\text{S7})$$

In step  $k$ , the volume of the meniscus ( $V_i$ ) at inlet  $i$  is obtained by

$$V_i = \frac{\pi}{6} h_i (3r_i^2 + (h_i)^2) \quad (\text{S8})$$

The change rate of  $V_i$  is thus expressed as

$$\frac{dV_i}{dt} = \frac{\pi(r_i^2 + (h_i(t))^2)}{2} \frac{dh_i(t)}{dt} \quad (\text{S9})$$

Because  $dV_i/dt$  is equal to  $Q_i$ , by applying eq S6 into eq S8, we obtain

$$\frac{dh_i(t)}{dt} = \frac{2C_i(P_{\text{JCT}} - P_i)}{\pi(r_i^2 + (h_i(t))^2)} \quad (\text{S10})$$

## 3. Meniscus pinning condition at the inlet rim

We experimentally confirmed the meniscus pinning at the inlet rim at the condition of (1) height-to-radius ratio  $h_i/r_i < 0.5$  and (2) solution contact angle  $>49^\circ$ . A stereo microscope was used to observe the side view of menisci at the inlet rims. To have different values of the water contact angles, the PDMS surface was plasma treated. By adjusting the plasma power and treatment duration, we obtained equilibrium contact angles of  $49^\circ$ ,  $70^\circ$ , and  $105^\circ$  on the PDMS surface. By the constant flow input ( $0.5 \mu\text{L/s}$ ) from a syringe pump, the inlet volume was increased and the inlet meniscus became more convex (Fig. S2a). The inlet meniscus remains pinned at the inlet rim up to 42 s. Then, the contact line of the meniscus moves over the rim. As such, we measured the maximum meniscus height ( $h_{\text{max}}$ ) that maintains meniscus pinning for inlet radii ( $r$ ) of 1 and 2 mm and contact angles of  $49^\circ$ ,  $70^\circ$ , and  $105^\circ$ . Fig. S2b shows that the value of  $h_{\text{max}} / r$  increases with increasing contact angle.

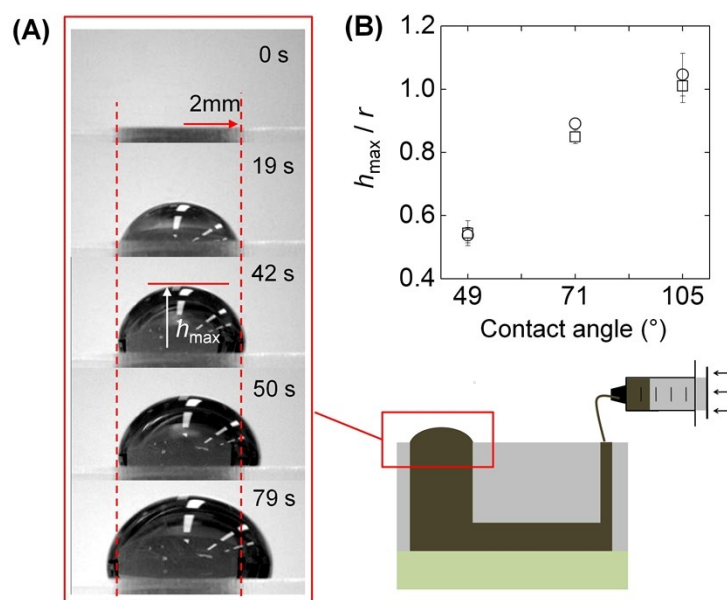

**Fig. S2.** Experimental validation of meniscus pinning at inlet rims. (A) Experimental setup and time lapse photos of the inlet meniscus. (B) Ratio of maximum meniscus height to inlet radius ( $h_{\text{max}} / r$ ) that preserve the meniscus pinning condition under the change of the contact angle. Here, symbols of rectangle and circle correspond to  $r = 1$  and  $2$  mm, respectively.

#### 4. Change of meniscus height and volume of inlet by inlet radius

We analyzed the effect of the size of channel 2 on  $\Delta V_{B2}$ , under constant condition of  $C_2$ . Fig. S3 shows that  $\Delta V_{B2}$  decreases with the increase in the width ( $W$ ) and height ( $h$ ) of channel 2. When  $W$  and  $h$  increase, the length ( $L$ ) of channel 2 increases to keep  $C_2$  constant. Because  $V_{Ch2} = WhL$ ,  $V_{Ch2}$  increases. However,  $V_2$ , which is the inlet meniscus volume, does not change because the other conditions do not change. Thus,  $\Delta V_{B2}$  decreases because  $\Delta V_{B2} = V_2/V_{Ch2}$ .

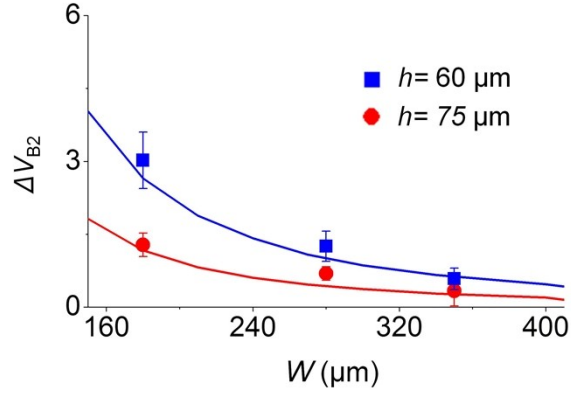

**Fig. S3.** Effect of the size of channel 2 on the normalized backflow volume ( $\Delta V_{B2}$ ).  $W$  and  $h$  are the width and height of channel 2, respectively. Lines and points are the theoretical and experimental ( $n = 3$ ) values, respectively. Here,  $C_i = 5, 9,$  and  $10 (\times 10^{-12}) \text{ m}^5 \text{ N}^{-1} \text{ s}^{-1}$  ( $i = 1$  to  $3$ ), and  $r_i = 2, 1,$  and  $1.25 \text{ mm}$ . In step 3,  $P_{i1} = 35, 35,$  and  $75 \text{ Pa}$ .

## 5. Change of meniscus height and volume of inlet by inlet radius

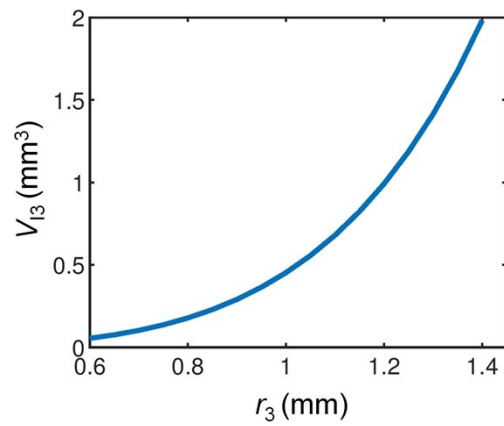

**Fig. S4.** Theoretical relation between  $r_3$  and initial meniscus volume ( $V_{13}$ ) of inlet 3. The result is obtained by applying eq (S3) to (S7).  $P_3$  is set as 75 Pa.

## 6. Change of volume ratio and inlet pressures by radius of inlet 2

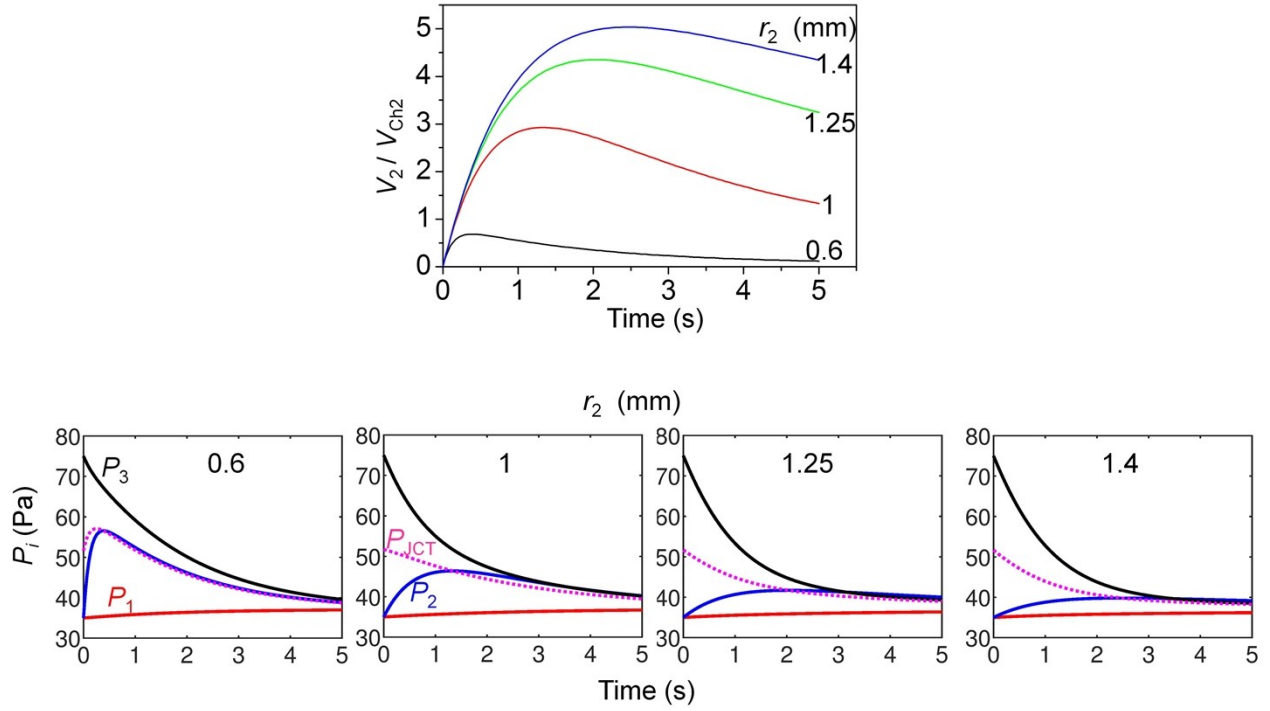

**Fig. S5.** Top graph shows the variation of the volume ratio ( $V_2/V_{Ch2}$ ) of the inlet meniscus volume ( $V_2$ ) and channel 2 volume ( $V_{Ch2}$ ) in step 3. Bottom graphs show temporal change of inlet and junction pressures in step 3. In step 3,  $P_{li}$  values ( $i = 1$  to 3) are 35, 35, and 75 Pa;  $r_1$  and  $r_3$  values are 2 and 1 mm; and  $C_i$  values are 5, 9, and 10 ( $\times 10^{-12}$ )  $m^5 N^{-1} s^{-1}$ , respectively.
